# Supplementary material for: Global Profiling of Genes Expressed in the Silk Glands of Philippine-Reared Mulberry Silkworms (Bombyx mori)
Source: MDPI journal article supplement (doi:10.3390/insects13080669), 2022-07-24
Supplement: s1 [file s1]

**Table S1.** DEGs between *Bombyx mori* CAR and TCMO strains within the p-adj threshold.

| Gene ID      | Normalized<br>mean exp | log <sub>2</sub><br>FoldChange | p <sub>adj</sub> | nr protein ID  | Description                                                                                   |
|--------------|------------------------|--------------------------------|------------------|----------------|-----------------------------------------------------------------------------------------------|
| LOC101740965 | 436.3777               | -12.8030                       | 1.31E-20         | XP_021203658.1 | myrosinase 1 isoform X2                                                                       |
| LOC101739591 | 85.9320                | -4.4249                        | 7.9232E-20       | XP_004926185.2 | transient receptor potential channel pyrexia isoform X1                                       |
| Hsp20.1      | 292.2198               | -4.4182                        | 7.45747E-17      | NP_001036941.1 | heat shock protein hsp20.1                                                                    |
| LOC101739033 | 79.1756                | 5.7239                         | 7.08597E-16      | XP_004928701.1 | zinc finger protein 664                                                                       |
| LOC105842960 | 215.2818               | -3.8422                        | 4.3454E-15       | XP_012552891.2 | oxygen-dependent choline dehydrogenase-like                                                   |
| LOC101741132 | 155.2555               | -4.9429                        | 6.18552E-15      | XP_037876863.1 | uncharacterized protein LOC101741132                                                          |
| LOC101740169 | 134.2197               | 8.3899                         | 1.81336E-14      | XP_004921688.3 | uncharacterized protein LOC101740169                                                          |
| LOC101745002 | 272.0163               | -3.4352                        | 1.11654E-13      | XP_004931443.1 | uncharacterized protein LOC101745002                                                          |
| LOC101743834 | 30.4942                | -4.5650                        | 4.97996E-13      | XP_037873172.1 | alkaline phosphatase, tissue-nonspecific isozyme isoform X1                                   |
| LOC101741105 | 66.9775                | -10.2153                       | 5.845E-13        | XP_021203655.1 | myrosinase 1                                                                                  |
| LOC101738171 | 162.2757               | -2.0042                        | 6.52152E-13      | XP_004927331.1 | SOSS complex subunit B homolog                                                                |
| LOC101741524 | 100.6655               | 6.9289                         | 1.98992E-12      | XP_004926609.1 | synaptic vesicle glycoprotein 2C                                                              |
| LOC101742796 | 649.1628               | 3.5420                         | 4.13955E-12      | XP_004929128.1 | carbonyl reductase [NADPH] 3                                                                  |
| LOC101740432 | 104.2471               | 3.0572                         | 4.37612E-12      | XP_004933592.1 | homocysteine-responsive endoplasmic reticulum-resident ubiquitin-like domain member 2 protein |
| LOC101746050 | 8256.2203              | -5.2850                        | 2.99109E-11      | NA             | uncharacterized LOC101746050                                                                  |
| LOC100101163 | 49.3780                | -3.2183                        | 1.84277E-10      | NP_001093089.1 | methyltransferase [ <i>Bombyx mori</i> ]                                                      |
| LOC101738036 | 76.9355                | -10.7102                       | 2.66044E-10      | XP_004924398.1 | serine protease inhibitor swm-1                                                               |
| LOC119629873 | 71.3362                | -5.3808                        | 6.24984E-10      | XP_037873295.1 | uncharacterized protein LOC119629873                                                          |
| LOC101746265 | 42.5051                | -4.0678                        | 1.15354E-09      | XP_037869847.1 | integral membrane protein GPR155 isoform X2                                                   |
| LOC105842878 | 2296.9477              | 3.3250                         | 2.84903E-09      | XP_037874818.1 | peroxidase-like                                                                               |
| 6pgl         | 48.4983                | 3.6675                         | 4.63226E-09      | NP_001091839.1 | 6-phosphogluconolactonase                                                                     |
| LOC101736392 | 957.5713               | -3.2824                        | 1.02626E-08      | XP_021209119.1 | L-sorbose 1-dehydrogenase                                                                     |
| LOC119629954 | 186.8266               | 7.5484                         | 1.91075E-08      | XP_037873483.1 | zinc finger BED domain-containing protein 4-like isoform X2                                   |
| LOC101739276 | 76.9759                | 6.1927                         | 2.16059E-08      | XP_037870249.1 | glucose dehydrogenase [FAD, quinone]                                                          |
| LOC101746864 | 62.8409                | -3.1714                        | 3.25936E-08      | XP_012549821.2 | protein Aster-B isoform X2                                                                    |
| LOC119629130 | 71.6572                | -4.1325                        | 3.70854E-08      | XP_037869956.1 | uncharacterized protein LOC119629130                                                          |
| LOC732895    | 58.3223                | 3.7175                         | 8.47329E-08      | NP_001040361.1 | heme oxygenase                                                                                |

|              |           |         |             |                |                                                        |
|--------------|-----------|---------|-------------|----------------|--------------------------------------------------------|
| LOC101743364 | 48.8056   | -2.6748 | 3.22564E-07 | XP_037871715.1 | uncharacterized protein LOC101743364 isoform X1        |
| LOC101744567 | 20.9682   | -8.8363 | 5.08256E-07 | XP_012548358.1 | neurologin-1                                           |
| Defensin     | 342.2128  | 2.2251  | 5.08256E-07 | NP_001128677.1 | defensin like protein 2 precursor                      |
| LOC119630495 | 28.3819   | 9.2422  | 5.08256E-07 | XP_037876003.1 | uncharacterized protein LOC119630495 isoform X1        |
| LOC101744852 | 106.5376  | 7.2630  | 6.16541E-07 | XP_037876651.1 | cytochrome P450 4V2 isoform X4                         |
| LOC101737305 | 37.1197   | 3.9218  | 7.11968E-07 | XP_004927603.2 | cytochrome P450 4C1                                    |
| LOC119629803 | 128.9255  | 7.6255  | 7.86642E-07 | XP_037872937.1 | zinc finger BED domain-containing protein 4-like       |
| LOC119629818 | 127.9309  | 7.6242  | 8.07675E-07 | XP_037873002.1 | zinc finger BED domain-containing protein 4-like       |
| LOC119629972 | 88.1535   | 5.2284  | 9.40984E-07 | XP_037873662.1 | uncharacterized protein LOC119629972                   |
| LOC105842393 | 62.8641   | 6.7307  | 1.61056E-06 | XP_037868479.1 | uncharacterized protein LOC105842393                   |
| LOC101745011 | 19.5005   | 3.5491  | 1.83925E-06 | XP_021208151.2 | complexin isoform X2                                   |
| LOC101741044 | 159.2426  | -1.8129 | 2.43435E-06 | XP_004922247.3 | uncharacterized protein LOC101741044 isoform X2        |
| UGT48C1      | 178.9960  | -7.9885 | 3.60103E-06 | XP_021203370.2 | UDP-glycosyltransferase UGT48C1 isoform X1             |
| LOC732890    | 56.6049   | 2.9106  | 5.49555E-06 | NP_001040356.1 | cytidylate kinase                                      |
| LOC105841524 | 48.0799   | -4.5150 | 6.2951E-06  | XP_021203172.2 | uncharacterized protein LOC105841524 isoform X2        |
| LOC101736673 | 138.5163  | 3.5415  | 6.2951E-06  | XP_004928770.2 | collagen alpha-1(I) chain                              |
| LOC119629287 | 55.3664   | 5.8955  | 7.62398E-06 | XP_037870519.1 | uncharacterized protein LOC119629287                   |
| LOC101735767 | 100.4671  | 1.7779  | 7.9117E-06  | XP_037876497.1 | methionine--tRNA ligase, mitochondrial                 |
| LOC101746671 | 149.6756  | 5.5972  | 1.46576E-05 | XP_004930015.2 | uncharacterized protein LOC101746671                   |
| LOC101738200 | 373.9220  | -6.3058 | 1.46576E-05 | XP_012544353.2 | fibroin heavy chain-like isoform X1                    |
| LOC101735908 | 22.6089   | -3.5650 | 1.46576E-05 | XP_037873557.1 | alpha-protein kinase 1                                 |
| LOC101744531 | 82.6066   | -2.3253 | 1.62158E-05 | XP_004932523.1 | charged multivesicular body protein 6-A                |
| LOC101738292 | 681.7750  | 2.4229  | 1.68767E-05 | XP_004922915.1 | 5-aminolevulinate synthase, nonspecific, mitochondrial |
| LOC119629772 | 40.7115   | -4.8036 | 1.68767E-05 | XP_037872819.1 | uncharacterized protein LOC119629772                   |
| LOC119628469 | 39.2529   | -4.5224 | 1.72227E-05 | XP_037866660.1 | uncharacterized protein LOC119628469                   |
| LOC101739203 | 77.1415   | 3.2882  | 2.2298E-05  | XP_004921596.1 | apolipoprotein D                                       |
| LOC101737676 | 1872.7443 | 1.4583  | 2.23613E-05 | XP_004924612.2 | esterase FE4                                           |
| LOC101740369 | 24.7646   | -2.9164 | 2.32599E-05 | XP_037874125.1 | RNA-binding protein fusilli isoform X2                 |
| LOC110386615 | 50.6045   | -4.0303 | 2.73796E-05 | XP_037874399.1 | uncharacterized protein LOC110386615                   |
| LOC101737374 | 28.8365   | -8.1384 | 4.79553E-05 | XP_021207354.1 | cytochrome P450 4C1 isoform X1                         |
| LOC101738942 | 1500.2417 | 1.7097  | 5.03961E-05 | XP_021206280.1 | luciferin sulfotransferase isoform X2                  |
| LOC100141438 | 29.0592   | -3.1726 | 5.03961E-05 | XP_037873044.1 | RAC serine/threonine-protein kinase                    |

|              |           |         |             |                |                                                              |
|--------------|-----------|---------|-------------|----------------|--------------------------------------------------------------|
| LOC119628846 | 29.3121   | -6.5021 | 5.36575E-05 | XP_037868561.1 | uncharacterized protein LOC119628846                         |
| LOC101745355 | 106.1541  | 1.5507  | 5.71438E-05 | XP_004921704.1 | probable methylthioribulose-1-phosphate dehydratase          |
| LOC110384718 | 88.9101   | -4.3995 | 6.29288E-05 | XP_021202481.1 | fungal protease inhibitor F-like                             |
| LOC101739257 | 47.4801   | -1.8892 | 6.35415E-05 | XP_037874882.1 | exocyst complex component 4                                  |
| LOC692953    | 692.4078  | 1.9867  | 6.59383E-05 | NP_001040258.1 | mitochondrial matrix protein p33                             |
| LOC119630131 | 61.2260   | 5.3064  | 7.45402E-05 | XP_037874548.1 | uncharacterized protein LOC119630131                         |
| LOC101743457 | 87.2210   | -3.2798 | 7.85846E-05 | XP_037875239.1 | phosphoglycolate phosphatase 1A, chloroplastic isoform X2    |
| LOC110384866 | 48.8552   | 4.8804  | 8.1652E-05  | XP_037876336.1 | uncharacterized protein LOC110384866                         |
| LOC101743996 | 649.6855  | -3.4249 | 8.18676E-05 | XP_004930083.1 | mitochondrial enolase superfamily member 1                   |
| LOC101737570 | 249.9943  | 1.5609  | 8.18676E-05 | XP_004923805.1 | uncharacterized protein LOC101737570 isoform X2              |
| LOC101743012 | 157.5805  | -2.4119 | 8.18676E-05 | XP_004922735.2 | zinc finger protein 511                                      |
| LOC101740590 | 21.8677   | 3.3215  | 8.18676E-05 | XP_004926527.1 | NADH-cytochrome b5 reductase-like                            |
| LOC101746778 | 22.6506   | -3.3239 | 0.000114347 | XP_004931758.1 | uncharacterized protein LOC101746778                         |
| LOC101742375 | 26.9154   | -6.5824 | 0.000117341 | XP_004921964.1 | intraflagellar transport protein 56 isoform X2               |
| LOC110386896 | 23.0589   | -2.6427 | 0.000180562 | XP_037871766.1 | zinc finger protein 679-like                                 |
| LOC101736092 | 94.8939   | -4.8740 | 0.000204722 | XP_021203605.1 | sugar transporter ERD6-like 6                                |
| LOC101738097 | 85.6395   | -1.9410 | 0.000213571 | XP_021207458.1 | mucin-5AC isoform X1                                         |
| LOC733096    | 65.5349   | 1.5271  | 0.000243971 | NP_001040508.1 | DCMP deaminase                                               |
| LOC119629365 | 20.2491   | -6.7152 | 0.000264902 | XP_037870961.1 | piggyBac transposable element-derived protein 3-like         |
| LOC101742019 | 120.6296  | 1.9747  | 0.000299259 | XP_037870489.1 | medium-chain acyl-CoA ligase ACSF2, mitochondrial isoform X1 |
| LOC101737615 | 58.0652   | -1.7416 | 0.000307651 | XP_004921584.1 | B-cell CLL/lymphoma 7 protein family member A                |
| LOC101741708 | 89.9756   | 2.3207  | 0.000344133 | XP_012544065.1 | b(0,+)-type amino acid transporter 1 isoform X2              |
| LOC101745433 | 510.7035  | -1.1336 | 0.000397207 | XP_037866532.1 | endochitinase A                                              |
| LOC101743020 | 27.1457   | -2.4883 | 0.00040381  | XP_004924866.1 | allantoinase isoform X2                                      |
| LOC119630755 | 45.0724   | 6.1943  | 0.000418409 | XP_037877167.1 | uncharacterized protein LOC119630755                         |
| LOC110386515 | 38.5069   | -4.1036 | 0.000419744 | NA             | uncharacterized LOC110386515                                 |
| LOC101745700 | 18.2071   | -3.5372 | 0.000440811 | XP_004922195.2 | zinc finger protein 235-like                                 |
| LOC110385639 | 11.0526   | -6.5652 | 0.000440811 | NA             | uncharacterized LOC110385639                                 |
| LOC119629474 | 25.0925   | -5.4229 | 0.000450222 | XP_037871247.1 | piggyBac transposable element-derived protein 3-like         |
| LOC101736158 | 103.1197  | 1.8942  | 0.000450222 | XP_004931999.1 | nuclear transcription factor Y subunit B-1 isoform X1        |
| LOC101746910 | 7070.8232 | 2.8209  | 0.000457546 | XP_012548096.1 | glucose dehydrogenase [FAD, quinone]                         |
| GSTz2        | 123.6960  | -2.2645 | 0.000460761 | NP_001040453.1 | glutathione S-transferase zeta 2                             |

|              |            |         |             |                |
|--------------|------------|---------|-------------|----------------|
| LOC101747201 | 15.6919    | 5.7137  | 0.0006104   | XP_037867172.1 |
| LOC119629696 | 32.1141    | -4.5968 | 0.000645091 | XP_037872383.1 |
| LOC101739623 | 59.8369    | -1.5139 | 0.000743006 | XP_012551644.2 |
| bcpi         | 1471.3920  | 1.1843  | 0.00080402  | NP_001037057.1 |
| LOC101744314 | 12.2742    | 4.8557  | 0.000848049 | XP_037874390.1 |
| Hr3          | 36.9941    | 2.6212  | 0.000872001 | NP_001037012.1 |
| LOC101742888 | 24.7841    | -2.2218 | 0.000925236 | XP_004927023.1 |
| LOC101736515 | 185.9575   | 3.6139  | 0.000952687 | XP_004923796.2 |
| Cbp          | 2164.0748  | -2.5407 | 0.001053862 | NP_001036998.2 |
| LOC101745024 | 110.4557   | -1.4067 | 0.001083378 | XP_012553114.1 |
| LOC101741933 | 9.2083     | -6.5633 | 0.001091497 | XP_004931726.3 |
| LOC101735447 | 11944.5239 | -3.7859 | 0.001236911 | XP_012550392.2 |
| serpin-3     | 46.7019    | -2.8853 | 0.001409995 | NP_001139723.1 |
| LOC101735499 | 20.6371    | 2.6719  | 0.001513601 | XP_037869262.1 |
| LOC101737540 | 483.2710   | -1.1185 | 0.001538896 | XP_021203782.2 |
| Fps          | 523.7709   | 0.9780  | 0.001582667 | NP_001036889.1 |
| LOC119629588 | 15.2652    | 3.0041  | 0.001582801 | XP_037871813.1 |
| LOC101737046 | 55.3370    | 1.4228  | 0.00168536  | XP_004922840.1 |
| LOC101746460 | 103.7242   | 1.7427  | 0.001685772 | XP_037871156.1 |
| LOC101743840 | 348.4453   | -3.7661 | 0.001685772 | XP_021205460.1 |
| LOC101740006 | 14.0182    | -4.8865 | 0.001685772 | XP_004927006.2 |
| Ser3         | 45997.7312 | -3.2035 | 0.001798348 | NP_001108116.1 |
| LOC101737798 | 580.9310   | -1.4028 | 0.001798348 | XP_037876890.1 |
| LOC101738622 | 54.3368    | -1.7508 | 0.001837383 | XP_004929858.1 |
| LOC101741066 | 268.5588   | 3.8200  | 0.001837383 | XP_037872403.1 |
| LOC101738233 | 20.1667    | 3.6308  | 0.001837383 | XP_021207797.1 |
| LOC692390    | 1070.7259  | 1.5822  | 0.001946265 | NP_001036850.1 |
| LOC101736553 | 10.9803    | -6.7070 | 0.002049542 | XP_021208619.1 |
| LOC101737629 | 197.4987   | -1.4563 | 0.002072972 | XP_037877610.1 |
| Lp-c12       | 11734.4947 | -3.9418 | 0.002088225 | NP_001095196.1 |
| LOC101745090 | 69.4287    | -1.7762 | 0.002109124 | XP_004928155.1 |
| LOC101738851 | 35.8867    | 2.0885  | 0.002109124 | XP_037874493.1 |

15-hydroxyprostaglandin dehydrogenase [NAD(+)]-like  
 uncharacterized protein LOC119629696  
 E3 ubiquitin-protein ligase MGRN1 isoform X2  
 BCP inhibitor precursor  
 myogenesis-regulating glycosidase isoform X5  
 hormone receptor 3  
 probable RNA methyltransferase CG11342  
 centromere/kinetochore protein zw10  
 carotenoid-binding protein isoform 1  
 serine/threonine-protein phosphatase 5  
 uncharacterized protein LOC101741933  
 low molecular mass 30 kDa lipoprotein 19G1-like isoform X1  
 serine protease inhibitor 32 precursor  
 nuclear pore complex protein Nup154  
 uncharacterized protein LOC101737540  
 farnesyl pyrophosphate syntase  
 uncharacterized protein LOC119629588 isoform X2  
 GDP-D-glucose phosphorylase 1  
 glucosamine-6-phosphate isomerase isoform X1  
 poxin isoform X1  
 muskelin isoform X1  
 sericin 3 precursor  
 monosaccharide-sensing protein 2-like  
 protein zer-1 homolog  
 farnesol dehydrogenase isoform X2  
 sodium-independent sulfate anion transporter  
 cathepsin B precursor  
 pancreatic lipase-related protein 2 isoform X1  
 protein transport protein Sec31A isoform X1  
 low molecular 30 kDa lipoprotein PBMHP-12 precursor  
 uncharacterized protein LOC101745090  
 Bloom syndrome protein homolog isoform X4

|              |           |         |             |                |                                                                                 |
|--------------|-----------|---------|-------------|----------------|---------------------------------------------------------------------------------|
| LOC101744388 | 133.2889  | 1.7375  | 0.002357683 | XP_004933079.2 | heparanase                                                                      |
| LOC119629464 | 11.1358   | -5.8035 | 0.002384697 | NA             | uncharacterized LOC119629464                                                    |
| LOC101739542 | 154.2530  | 1.1554  | 0.002501082 | XP_037874453.1 | E3 ubiquitin-protein ligase RNF126 isoform X2                                   |
| LOC101736715 | 31.3738   | -5.3239 | 0.002611968 | XP_004927192.1 | uncharacterized protein LOC101736715 isoform X1                                 |
| LOC105842712 | 17.7374   | -4.4995 | 0.00312289  | XP_012552399.1 | piggyBac transposable element-derived protein 3                                 |
| LOC101747147 | 9.1078    | 5.8310  | 0.003361305 | XP_004932959.1 | sodium-coupled monocarboxylate transporter 2 isoform X1                         |
| LOC101740041 | 67.5965   | -1.2152 | 0.003385278 | XP_037871472.1 | rho GTPase-activating protein 26 isoform X2                                     |
| LOC101741909 | 236.4112  | -1.8386 | 0.003515856 | XP_037867532.1 | zonadhesin isoform X5                                                           |
| LOC101738370 | 35.0129   | 1.9059  | 0.003681913 | XP_037875792.1 | dipeptidyl peptidase 9 isoform X1                                               |
| LOC101746588 | 56.6261   | -2.2034 | 0.003785429 | XP_004931352.1 | copper homeostasis protein cutC homolog isoform X2                              |
| NGR-B3       | 93.5326   | -3.0348 | 0.003785429 | NP_001127734.1 | neuropeptide receptor B3 precursor                                              |
| LOC101746342 | 208.8797  | 1.8174  | 0.003785429 | XP_037876002.1 | probable C-mannosyltransferase DPY19L1 isoform X4                               |
| LOC101736769 | 350.2724  | 0.9123  | 0.003806654 | XP_037867014.1 | peroxidasin isoform X2                                                          |
| Cyp6ab5      | 12.2075   | 4.7385  | 0.003806654 | NP_001104007.1 | cytochrome P450, family 6, subfamily ab, polypeptide 5                          |
| CPR100       | 25.6407   | -4.2721 | 0.003835028 | NP_001166666.1 | cuticular protein RR-2 motif 100 precursor                                      |
| LOC101745301 | 17.9101   | 5.5845  | 0.004136918 | XP_004931827.1 | SET domain-containing protein SmydA-8                                           |
| LOC101736683 | 29.2235   | -2.6711 | 0.004219006 | XP_012550355.1 | uncharacterized protein LOC101736683 isoform X1                                 |
| LOC101735438 | 28.8171   | 1.7773  | 0.004284124 | XP_012551683.1 | erythroid differentiation-related factor 1                                      |
| LOC119629020 | 15.0173   | 4.3707  | 0.004318845 | NA             | uncharacterized LOC119629020                                                    |
| LOC101740099 | 86.3404   | 1.5094  | 0.004318845 | XP_037873937.1 | balbiani ring protein 3 isoform X6                                              |
| LOC101737414 | 862.7412  | -1.8526 | 0.004393456 | XP_004932559.2 | dihydropyrimidine dehydrogenase [NADP(+)]                                       |
| LOC110385229 | 47.5588   | 3.1399  | 0.004393456 | NA             | uncharacterized LOC110385229                                                    |
| LOC101738447 | 62.7279   | -2.3555 | 0.004552091 | XP_037873274.1 | heme transporter hrg1-A                                                         |
| LOC101739299 | 330.8936  | -1.7202 | 0.004912662 | XP_037874377.1 | probable isocitrate dehydrogenase [NAD] subunit alpha, mitochondrial isoform X2 |
| LOC101745377 | 402.7614  | -4.1387 | 0.005254193 | XP_012545734.2 | uncharacterized protein LOC101745377 isoform X1                                 |
| LOC101737347 | 497.0754  | 6.9329  | 0.005445737 | XP_004926654.1 | calexictin-2                                                                    |
| CPG18        | 107.1604  | -4.3882 | 0.00557497  | NP_001166786.1 | cuticular protein glycine-rich 18 precursor                                     |
| LOC119630067 | 1320.5437 | -4.3720 | 0.005592678 | XP_037874089.1 | leech-derived tryptase inhibitor C-like                                         |
| LOC101741441 | 632.7040  | 1.3210  | 0.005828885 | XP_004928837.2 | protein windbeutel                                                              |
| LOC101746346 | 20.1012   | 4.1215  | 0.005882442 | XP_012548107.2 | phospholipase A2 isoform X1                                                     |
| LOC101735657 | 48.1814   | 1.8607  | 0.006002377 | XP_037866431.1 | retinol-binding protein pinta isoform X1                                        |

|              |           |         |             |                |                                                                               |
|--------------|-----------|---------|-------------|----------------|-------------------------------------------------------------------------------|
| LOC101736654 | 105.2267  | 1.1135  | 0.006011422 | XP_004924197.1 | PCNA-associated factor                                                        |
| LOC101741202 | 14.7489   | 3.3288  | 0.006095487 | XP_004924790.1 | protein spaetzle 5                                                            |
| LOC119630233 | 27.7309   | 4.2403  | 0.006095487 | XP_037874852.1 | uncharacterized protein LOC119630233                                          |
| LOC101744339 | 102.1022  | -1.1300 | 0.006148767 | XP_004932094.1 | general transcription factor IIH subunit 2                                    |
| LOC101738392 | 72.6024   | 1.5487  | 0.006640209 | XP_004926995.1 | probable protein BRICK1-B                                                     |
| Pi-t1        | 43.2140   | 6.8978  | 0.006683902 | XP_012545178.1 | inorganic phosphate transporter 1 isoform X1                                  |
| LOC101745811 | 79.1749   | -3.0516 | 0.006683902 | XP_037869338.1 | receptor-type guanylate cyclase Gyc76C                                        |
| BGRP1        | 93.3594   | -4.5930 | 0.006683902 | NP_001036840.1 | beta-1,3-glucan-binding protein precursor                                     |
| serpin-21    | 16.6777   | 2.4629  | 0.006683902 | XP_012547718.2 | serine protease inhibitor 21 isoform X2                                       |
| LOC732939    | 144.0499  | -1.3130 | 0.006683902 | NP_001040403.1 | protein tyrosine phosphatase                                                  |
| LOC119629761 | 96.8824   | 1.9886  | 0.006776911 | NA             | uncharacterized LOC119629761                                                  |
| LOC101735802 | 45.6385   | -1.6993 | 0.007042    | XP_037877676.1 | nuclear factor of activated T-cells 5 isoform X3                              |
| LOC119630597 | 54.7109   | 2.3391  | 0.007184144 | XP_037876439.1 | putative nuclease HARBI1                                                      |
| LOC101736055 | 49.4370   | 1.5404  | 0.00721305  | XP_004929249.1 | alpha-tocopherol transfer protein-like                                        |
| LOC101742946 | 48.4280   | 1.3929  | 0.007618459 | XP_037866929.1 | U2 snRNP-associated SURP motif-containing protein isoform X1                  |
| Pbanr        | 43.1013   | 1.9007  | 0.007644961 | NP_001036977.1 | pheromone biosynthesis activating neuropeptide receptor                       |
| LOC101736451 | 13.0569   | -3.6761 | 0.007951096 | XP_012548466.2 | adenylate kinase isoenzyme 5 isoform X1                                       |
| LOC101742504 | 243.4709  | 1.2674  | 0.008118876 | XP_004928639.1 | deoxynucleotidyltransferase terminal-interacting protein 2                    |
| LOC101747035 | 12.6918   | -2.7384 | 0.008118876 | XP_037876045.1 | uncharacterized protein LOC101747035 isoform X3                               |
| aif          | 55.6195   | -4.9982 | 0.00817319  | NP_001189462.1 | apoptosis-inducing factor                                                     |
| LOC101745380 | 37.0384   | -1.6647 | 0.008305924 | XP_004926344.1 | putative Dol-P-Glc:Glc(2)Man(9)GlcNAc(2)-PP-Dol alpha-1,2-glucosyltransferase |
| LOC110385006 | 14.6201   | -3.7004 | 0.008340161 | NA             | uncharacterized LOC110385006                                                  |
| LOC101737789 | 49.5051   | -1.5932 | 0.008466473 | XP_004930829.2 | zinc finger protein 1                                                         |
| LOC101738327 | 163.7102  | 1.1017  | 0.00848003  | XP_004922571.1 | peroxisome biogenesis factor 10                                               |
| LOC110385781 | 16.6583   | -2.2657 | 0.008480489 | XP_021205836.1 | zinc finger protein 506                                                       |
| LOC693069    | 1014.8224 | 0.8459  | 0.00872048  | XP_012551823.1 | protein kinase c inhibitor isoform X1                                         |
| LOC101743935 | 18.1234   | -5.7499 | 0.008998049 | XP_037867726.1 | synaptic vesicle 2-related protein                                            |
| LOC101744645 | 41.3446   | -2.1529 | 0.008998049 | XP_021203165.1 | uncharacterized protein LOC101744645 isoform X3                               |
| LOC119630438 | 19.1528   | 2.4834  | 0.008998049 | NA             | uncharacterized LOC119630438                                                  |
| LOC119631038 | 12.0177   | -5.5486 | 0.008998049 | XP_037877480.1 | uncharacterized protein LOC119631038                                          |
| ae25         | 1157.4771 | 0.8128  | 0.009061947 | NP_001121784.1 | alpha-esterase 25                                                             |



|              |           |         |             |                |                                                                     |
|--------------|-----------|---------|-------------|----------------|---------------------------------------------------------------------|
| LOC101745270 | 49.2460   | -1.4138 | 0.009117792 | XP_004922192.1 | gastrula zinc finger protein xLCGF3.1-like                          |
| LOC101740700 | 313.6924  | -1.0781 | 0.009117792 | XP_004933459.1 | threonine--tRNA ligase 1, cytoplasmic isoform X2                    |
| LOC101746572 | 124.2922  | 1.1811  | 0.00930581  | XP_004927517.1 | venom allergen 5                                                    |
| LOC101743783 | 125.4666  | -3.5698 | 0.009546241 | XP_004926544.2 | alpha-aminoadipic semialdehyde synthase, mitochondrial              |
| LOC110385255 | 81.5810   | 1.9876  | 0.010048603 | NA             | uncharacterized LOC110385255                                        |
| LOC119630363 | 48.4674   | -3.1852 | 0.010074067 | XP_037875446.1 | uncharacterized protein LOC119630363                                |
| LOC101739130 | 47.1297   | 1.5048  | 0.010103089 | XP_012546966.1 | uncharacterized protein LOC101739130 isoform X2                     |
| LOC119630310 | 2725.0231 | 5.1326  | 0.011026139 | XP_037875176.1 | probable protein phosphatase DDB_G0282105                           |
| LOC101741156 | 54.9691   | 1.8039  | 0.011026139 | XP_004926607.1 | synaptic vesicle 2-related protein isoform X1                       |
| LOC119630039 | 7.9873    | 4.8859  | 0.011026139 | XP_037873922.1 | uncharacterized protein LOC119630039 isoform X2                     |
| LOC119630340 | 55.1884   | 2.6400  | 0.011282782 | NA             | uncharacterized LOC119630340                                        |
| LOC101747227 | 112.1781  | 1.7345  | 0.01142055  | XP_037874831.1 | cystinosin homolog isoform X2                                       |
| LOC119630069 | 114.2214  | 1.5548  | 0.011521776 | NA             | uncharacterized LOC119630069                                        |
| LOC101740008 | 17.0264   | 2.7722  | 0.011531323 | XP_037875735.1 | activity-regulated cytoskeleton associated protein 2 isoform X2     |
| LOC101737319 | 40.7963   | -1.5975 | 0.011854464 | XP_037866795.1 | arfGAP with SH3 domain, ANK repeat and PH domain-containing protein |
| LOC101744002 | 109.9652  | -2.1056 | 0.012411105 | XP_037874975.1 | uncharacterized protein LOC101744002 isoform X2                     |
| LOC692743    | 25.2986   | 1.6365  | 0.01242231  | NP_001104817.1 | hemocytin                                                           |
| Anxb13       | 55.2056   | -3.6199 | 0.01242231  | NP_001036881.1 | annexin B13                                                         |
| LOC119629744 | 3782.7543 | -3.8704 | 0.013938696 | NA             | uncharacterized LOC119629744                                        |
| LOC119630552 | 468.6001  | 6.8415  | 0.013953725 | XP_037876282.1 | uncharacterized protein LOC119630552                                |
| LOC119628590 | 10.0443   | 2.9698  | 0.013953725 | NA             | U6 spliceosomal RNA                                                 |
| LOC101738067 | 18.1913   | -3.7450 | 0.0144057   | XP_004922569.1 | uncharacterized protein LOC101738067 isoform X1                     |
| LOC101742140 | 270.1456  | -0.9117 | 0.014588048 | XP_004922106.1 | protein TRC8 homolog                                                |
| LOC101746901 | 22.1271   | 2.4363  | 0.014772403 | XP_004926641.1 | uncharacterized protein LOC101746901                                |
| LOC119629473 | 35.3614   | -2.5051 | 0.015229363 | XP_037871245.1 | uncharacterized protein LOC119629473 isoform X1                     |
| LOC119630219 | 115.0564  | 1.5478  | 0.015385681 | NA             | uncharacterized LOC119630219                                        |
| LOC101747054 | 1038.1596 | -1.9193 | 0.015548832 | XP_037872304.1 | cytosolic 10-formyltetrahydrofolate dehydrogenase                   |
| LOC105842192 | 145.1087  | -2.7541 | 0.015693241 | XP_037866765.1 | E3 SUMO-protein ligase ZBED1-like isoform X1                        |
| LOC119628805 | 117.9789  | -2.6191 | 0.015777985 | XP_037868454.1 | E3 SUMO-protein ligase ZBED1-like                                   |
| LOC101736941 | 17.2266   | 2.3697  | 0.015777985 | XP_037870401.1 | DDB1- and CUL4-associated factor 7                                  |
| LOC100862837 | 26.8426   | 2.2233  | 0.015823702 | NP_001243987.1 | laminin beta-2 chain                                                |

|              |           |         |             |                |                                                                    |
|--------------|-----------|---------|-------------|----------------|--------------------------------------------------------------------|
| LOC119629466 | 124.9122  | -2.6771 | 0.015896725 | XP_037871213.1 | E3 SUMO-protein ligase ZBED1-like                                  |
| LOC101740637 | 9.2388    | 6.3410  | 0.016072467 | XP_037870853.1 | organic cation transporter protein                                 |
| LOC105842089 | 1306.9154 | -1.2964 | 0.016325196 | NA             | uncharacterized LOC105842089                                       |
| LOC101747097 | 89.3299   | 1.6019  | 0.016501924 | XP_037874112.1 | piggyBac transposable element-derived protein 4 isoform X1         |
| LOC101744559 | 52.9519   | 2.7408  | 0.016657549 | XP_037872288.1 | 4-coumarate--CoA ligase 1                                          |
| LOC101742496 | 359.4151  | -2.5713 | 0.016912277 | XP_004926880.2 | lysosomal acid glucosylceramidase isoform X1                       |
| LOC101740833 | 34.9767   | 2.7517  | 0.017975495 | XP_037867180.1 | uncharacterized protein LOC101740833 isoform X2                    |
| LOC119629479 | 52.9033   | 2.5507  | 0.017975495 | NA             | uncharacterized LOC119629479                                       |
| LOC101738547 | 27.8274   | 5.2226  | 0.018075138 | XP_012550588.2 | uncharacterized protein LOC101738547                               |
| LOC101741173 | 102.1429  | -1.1233 | 0.018075138 | XP_021206845.1 | probable phosphorylase b kinase regulatory subunit beta isoform X5 |
| LOC105842032 | 10.1780   | -3.9996 | 0.018762185 | NA             | uncharacterized LOC105842032                                       |
| LOC692961    | 13.8859   | 2.7570  | 0.01890377  | NP_001040266.1 | peroxisomal membrane anchor protein                                |
| LOC119629492 | 116.7996  | 1.5473  | 0.018982016 | NA             | uncharacterized LOC119629492                                       |
| LOC101740686 | 118.4307  | 1.3334  | 0.019666643 | NP_001091795.2 | uncharacterized protein LOC778500                                  |
| LOC101746454 | 20.1610   | 2.2083  | 0.019976797 | XP_004933013.1 | uncharacterized protein LOC101746454                               |
| LOC101738529 | 343.2288  | 1.0623  | 0.020211768 | XP_004926437.1 | putative riboflavin kinase                                         |
| LOC692641    | 70.1263   | 1.2092  | 0.020317288 | XP_037870667.1 | hemolin-interacting protein isoform X1                             |
| LOC692889    | 242.5401  | -2.6741 | 0.020399564 | NP_001040198.1 | mitochondrial aldehyde dehydrogenase                               |
| LOC119630931 | 40.8039   | -2.5337 | 0.020399564 | XP_037877398.1 | uncharacterized protein LOC119630931 isoform X1                    |
| LOC101740778 | 34.3696   | -2.1800 | 0.020425177 | XP_012545410.1 | solute carrier family 25 member 40                                 |
| LOC119629041 | 44.1530   | 2.6111  | 0.020425177 | NA             | uncharacterized LOC119629041                                       |
| Jheh-lp2     | 706.4487  | 2.0057  | 0.020425177 | XP_012551156.1 | juvenile hormone epoxide hydrolase-like protein 2 isoform X1       |
| LOC119630443 | 127.9378  | -2.6359 | 0.020425177 | XP_037875845.1 | E3 SUMO-protein ligase ZBED1-like isoform X1                       |
| LOC101744175 | 23.5616   | -5.2183 | 0.020483839 | XP_004926335.2 | uncharacterized protein LOC101744175                               |
| LOC119630429 | 40.4766   | -2.5092 | 0.020483839 | XP_037875753.1 | uncharacterized protein LOC119630429 isoform X1                    |
| LOC110386692 | 18.3815   | 2.2110  | 0.020483839 | XP_037876528.1 | putative nuclease HARB1                                            |
| LOC101746322 | 183.5695  | -3.5909 | 0.021111605 | XP_004923446.1 | uncharacterized protein LOC101746322                               |
| LOC101745500 | 37.1421   | -6.3024 | 0.021314753 | XP_004933911.2 | heat shock protein 68                                              |
| LOC101745977 | 12.2182   | 2.9233  | 0.021475    | XP_037869837.1 | dynein intermediate chain 3, ciliary isoform X1                    |
| LOC101735832 | 70.7824   | -5.2025 | 0.022260651 | XP_037876874.1 | heat shock protein 68                                              |
| LOC119630910 | 40.4831   | -2.4932 | 0.022266341 | XP_037877370.1 | uncharacterized protein LOC119630910 isoform X2                    |



|              |            |         |             |                |                                                      |
|--------------|------------|---------|-------------|----------------|------------------------------------------------------|
| LOC119628546 | 40.3348    | -2.4932 | 0.022376714 | XP_037867082.1 | uncharacterized protein LOC119628546 isoform X1      |
| LOC101743061 | 16.6514    | 4.5251  | 0.022376714 | XP_021206117.1 | coiled-coil domain-containing protein 112 isoform X2 |
| LOC101738817 | 89.8397    | -1.2855 | 0.022487624 | XP_004931785.1 | fatty-acid amide hydrolase 2-B                       |
| LOC101740925 | 16.7327    | 3.0227  | 0.022961868 | XP_004927860.1 | LIM domain only protein 3 isoform X1                 |
| LOC110386138 | 7.0539     | 6.2283  | 0.023410754 | XP_037874038.1 | microvitellogenin                                    |
| CPG16        | 95.7801    | -5.0352 | 0.023447535 | NP_001161189.1 | cuticular protein glycine-rich 16 precursor          |
| LOC101740975 | 6.8303     | 5.7860  | 0.023698478 | XP_037866483.1 | protein eyes shut                                    |
| Sec61alpha   | 7714.9013  | -0.5131 | 0.024175031 | NP_001037628.1 | transport protein Sec61 alpha subunit                |
| LOC101744109 | 7.2015     | -5.4583 | 0.025007568 | XP_004923010.1 | thioredoxin domain-containing protein 2              |
| LOC101747044 | 209.3939   | -1.0220 | 0.025497684 | XP_012548413.1 | calcium channel flower isoform X2                    |
| LOC101740701 | 11.0045    | -2.3619 | 0.025798396 | XP_037877166.1 | uncharacterized protein LOC101740701 isoform X2      |
| LOC119630724 | 101.9508   | -2.7804 | 0.025798396 | XP_037877017.1 | E3 SUMO-protein ligase ZBED1-like                    |
| LOC101745785 | 116.6687   | 1.1430  | 0.026152852 | XP_037868754.1 | nostrin isoform X1                                   |
| LOC101737191 | 268.0840   | 2.1530  | 0.026152852 | XP_004924201.1 | adenylyltransferase and sulfurtransferase MOCS3      |
| LOC119629754 | 49.2189    | 2.0778  | 0.026152852 | XP_037872680.1 | putative nuclease HARBI1                             |
| LOC733093    | 169.0379   | -6.1399 | 0.026152852 | NP_001296526.1 | heat shock protein 70 A1                             |
| LOC101743121 | 46.6809    | 1.5764  | 0.026511527 | XP_004928141.1 | mitochondrial 2-oxodicarboxylate carrier             |
| LOC101737917 | 98.1441    | -4.5415 | 0.02661084  | XP_004928608.1 | argininosuccinate synthase                           |
| UGT40A1      | 264.7748   | 1.8292  | 0.027758128 | XP_021207027.1 | phenol UDP-glucosyltransferase isoform X1            |
| LOC110385299 | 13.8684    | -2.6829 | 0.027896303 | NA             | uncharacterized LOC110385299                         |
| LOC101739133 | 208.8506   | -1.7621 | 0.028015126 | XP_004928444.1 | forkhead box protein N3                              |
| LOC101742155 | 131.4707   | 1.1755  | 0.028434771 | XP_004925979.1 | zinc transporter ZIP9                                |
| LOC119629396 | 10.2031    | -2.8794 | 0.029397831 | XP_037871010.1 | uncharacterized protein LOC119629396 isoform X2      |
| LOC101736618 | 21.6834    | -4.5748 | 0.02961971  | XP_021204275.1 | uncharacterized protein LOC101736618                 |
| LOC101736556 | 19.1988    | -6.1704 | 0.029669414 | XP_004922836.1 | uncharacterized protein LOC101736556                 |
| LOC119629469 | 120.2180   | -2.6178 | 0.029763987 | XP_037871217.1 | E3 SUMO-protein ligase ZBED1-like isoform X2         |
| LOC101745388 | 7.1318     | -5.1283 | 0.029814053 | XP_037870547.1 | glucose dehydrogenase [FAD, quinone] isoform X1      |
| LOC101745643 | 383.3770   | 1.4224  | 0.029814053 | XP_004921842.1 | H/ACA ribonucleoprotein complex subunit 3            |
| LOC101737886 | 36.5251    | 1.7453  | 0.029837634 | XP_004933304.1 | dymeclin                                             |
| LOC101737012 | 247.3246   | -0.7885 | 0.030110158 | XP_004923800.1 | AP-1 complex subunit mu-1                            |
| LOC101744161 | 24.6037    | -2.8076 | 0.030369332 | XP_004934376.1 | uncharacterized protein LOC101744161                 |
| LOC101737792 | 98398.9313 | -1.6625 | 0.030369332 | NA             | uncharacterized LOC101737792                         |

|              |            |         |             |                |                                                                      |
|--------------|------------|---------|-------------|----------------|----------------------------------------------------------------------|
| LOC101736258 | 10.2078    | -2.8967 | 0.030369332 | XP_037872173.1 | microprocessor complex subunit DGCR8                                 |
| LOC119630704 | 6.3025     | -7.0989 | 0.030369332 | XP_037876982.1 | facilitated trehalose transporter Tret1-like                         |
| LOC119629285 | 126.9290   | -2.0555 | 0.030467521 | XP_037870514.1 | E3 SUMO-protein ligase ZBED1-like                                    |
| LOC101740657 | 35.4777    | 1.3758  | 0.030629833 | XP_004931797.2 | EF-hand domain-containing protein D2 homolog                         |
| LOC119628831 | 94852.7065 | -1.6467 | 0.030857697 | XP_037868513.1 | uncharacterized protein LOC119628831                                 |
| LOC101736687 | 31.5429    | 1.4775  | 0.030857697 | XP_012550842.1 | integrator complex subunit 12                                        |
| LOC119630586 | 374.6982   | 1.5903  | 0.030857697 | XP_037876393.1 | 4-coumarate--CoA ligase 1-like                                       |
| CPH43        | 98339.9145 | -1.6542 | 0.031547246 | NP_001166198.1 | cuticular protein hypothetical 43                                    |
| LOC110384846 | 55.6125    | -5.7349 | 0.031547246 | NA             | uncharacterized LOC110384846                                         |
| LOC101742998 | 9.6505     | -5.7081 | 0.031569206 | XP_037870167.1 | laminin subunit alpha                                                |
| LOC101739568 | 221.4114   | 1.0020  | 0.032012905 | XP_012546333.1 | zinc-type alcohol dehydrogenase-like protein SERP1785                |
| LOC101735380 | 19.2599    | -2.8609 | 0.032243371 | XP_037871626.1 | caytaxin                                                             |
| LOC105842250 | 23.8495    | -3.9848 | 0.032243371 | XP_037867444.1 | acetyl-coenzyme A synthetase 1                                       |
| LOC101746507 | 116.0722   | -3.6588 | 0.032243371 | XP_021205043.2 | gelsolin                                                             |
| LOC101740822 | 38.4795    | 1.6476  | 0.032243371 | XP_021204306.1 | uncharacterized protein LOC101740822                                 |
| Jheh2        | 230.7409   | -1.7595 | 0.032522795 | NP_001037201.2 | juvenile hormone epoxide hydrolase precursor                         |
| AGPAT2       | 38.0930    | -2.0268 | 0.032717968 | NP_001266388.1 | 1-acylglycerol-3-phosphate O-acyltransferase 2                       |
| LOC119630684 | 69.8314    | -2.4554 | 0.032984355 | XP_037876866.1 | uncharacterized protein LOC119630684                                 |
| LOC101743176 | 39.5355    | -3.8655 | 0.033662291 | XP_004927095.1 | uncharacterized protein LOC101743176                                 |
| LOC119628848 | 74905.2360 | -1.7668 | 0.034366636 | NA             | uncharacterized LOC119628848                                         |
| LOC101744132 | 77.1404    | -2.0090 | 0.034516246 | NP_001299580.1 | potassium voltage-gated channel subfamily H member 6-like            |
| LOC105841738 | 67.5999    | 1.9196  | 0.034516246 | XP_012546519.1 | 3-ketoacyl-CoA thiolase, mitochondrial                               |
| LOC101737321 | 33.4702    | 2.0387  | 0.034870313 | XP_037870136.1 | pre-mRNA-splicing factor ATP-dependent RNA helicase PRP16 isoform X3 |
| Hsp23.7      | 122.4451   | -1.8649 | 0.034895265 | NP_001036942.1 | heat shock protein hsp23.7 precursor                                 |
| LOC119629460 | 56.5737    | 1.6072  | 0.035684467 | XP_037871180.1 | uncharacterized protein LOC119629460                                 |
| LOC100101154 | 475.5711   | 1.2849  | 0.035684467 | NP_001093080.1 | ecdysteroid-regulated 16 kDa protein precursor                       |
| LOC119630428 | 142.8734   | 1.5937  | 0.035968369 | NA             | uncharacterized LOC119630428                                         |
| LOC733048    | 49.5522    | -1.4484 | 0.035968369 | NP_001040505.1 | vacuolar protein sorting 29                                          |
| LOC101744960 | 173.9568   | 2.6379  | 0.036309368 | XP_004931615.1 | alanine--glyoxylate aminotransferase 2, mitochondrial                |
| LOC119630068 | 63.3347    | -2.3948 | 0.038078906 | XP_037874105.1 | uncharacterized protein LOC119630068                                 |
| LOC101743813 | 30.4522    | -4.5689 | 0.038166052 | NP_001296544.1 | uncharacterized LOC101743813 precursor                               |

|              |          |         |             |                |                                                                                    |
|--------------|----------|---------|-------------|----------------|------------------------------------------------------------------------------------|
| LOC101735683 | 17.4561  | 3.8061  | 0.038889751 | XP_004922895.1 | myophilin                                                                          |
| LOC101737690 | 81.3622  | -0.9384 | 0.038889751 | XP_004928691.2 | uncharacterized protein LOC101737690                                               |
| LOC101735750 | 83.7756  | 5.7897  | 0.038889751 | XP_021204987.2 | uncharacterized protein LOC101735750                                               |
| CPR102       | 17.8215  | -4.6055 | 0.038889751 | NP_001166664.1 | cuticular protein RR-2 motif 102 precursor                                         |
| LOC101737984 | 80.9916  | -3.6911 | 0.039065285 | XP_004923731.1 | ommochrome-binding protein                                                         |
| LOC119628772 | 9.8880   | 2.4769  | 0.039927081 | NA             | U6 spliceosomal RNA                                                                |
| LOC119630793 | 10.0258  | -5.8149 | 0.040298035 | NA             | uncharacterized LOC119630793                                                       |
| LOC692400    | 76.6567  | -1.9076 | 0.040494838 | NP_001036859.1 | ecdysteroid-inducible angiotensin-converting enzyme-related gene product precursor |
| LOC105841915 | 24.6442  | 1.8240  | 0.040605825 | NA             | uncharacterized LOC105841915                                                       |
| LOC105841701 | 33.0616  | 1.9733  | 0.04158315  | NA             | uncharacterized LOC105841701                                                       |
| LOC101746721 | 11.9516  | 2.5696  | 0.041721027 | XP_004929513.1 | phospholipase A1                                                                   |
| LOC105841833 | 6.8932   | -3.1382 | 0.041721027 | NA             | uncharacterized LOC105841833                                                       |
| LOC101738281 | 39.7263  | -2.5804 | 0.041899513 | XP_037872876.1 | solute carrier family 28 member 3                                                  |
| LOC101742436 | 92.0742  | 0.8814  | 0.041899513 | XP_012552946.1 | uncharacterized protein LOC101742436 isoform X2                                    |
| LOC101745373 | 17.3787  | -5.2325 | 0.04212556  | XP_004924880.1 | integrin beta-8 isoform X2                                                         |
| LOC100101225 | 62.9109  | -1.4361 | 0.042560454 | NP_001093318.1 | methylated DNA-protein cysteine methyltransferase                                  |
| LOC101740251 | 34.7831  | -4.2956 | 0.043020783 | XP_021207352.2 | sialin                                                                             |
| LOC101742931 | 73.9749  | 1.3046  | 0.043020783 | XP_021203208.2 | UDP-N-acetylglucosamine transferase subunit ALG13 homolog                          |
| LOC101742364 | 6.0161   | -3.5493 | 0.04348108  | XP_012550084.2 | CDK5 and ABL1 enzyme substrate 2 isoform X2                                        |
| LOC101741812 | 93.9780  | -1.4497 | 0.043533408 | XP_004927283.1 | flap endonuclease 1                                                                |
| LOC101738998 | 45.2038  | 1.7580  | 0.044246903 | NA             | uncharacterized LOC101738998                                                       |
| LOC119629686 | 9.6060   | -4.6288 | 0.044246903 | XP_037872327.1 | uncharacterized protein LOC119629686                                               |
| LOC101744328 | 767.7122 | 0.8004  | 0.044413822 | XP_037872347.1 | alpha-tocopherol transfer protein-like                                             |
| LOC101742342 | 130.5231 | 2.3235  | 0.04444487  | XP_037876483.1 | cytochrome P450 4V2                                                                |
| Mf-cpa       | 4.7859   | 4.8699  | 0.045663678 | NP_001036933.1 | molting fluid carboxypeptidase A precursor                                         |
| LOC101738628 | 25.8428  | 4.0536  | 0.045663678 | XP_004930880.1 | maltase A1                                                                         |
| LOC101746080 | 26.2357  | -2.9412 | 0.045663678 | XP_004921646.1 | cilia- and flagella-associated protein 299 isoform X1                              |
| LOC110385599 | 108.0606 | 1.1225  | 0.045663678 | NA             | uncharacterized LOC110385599                                                       |
| LOC101740518 | 8.6175   | 4.4165  | 0.046112984 | XP_004931946.1 | elongation of very long chain fatty acids protein AAEL008004                       |
| LOC101741137 | 32.8835  | -3.9105 | 0.047058755 | XP_004922659.1 | tryptophan 2,3-dioxygenase                                                         |
| LOC101745446 | 64.8051  | 0.9335  | 0.047239428 | XP_004933009.1 | TBC1 domain family member 7                                                        |

|              |            |         |             |                |                                                                            |
|--------------|------------|---------|-------------|----------------|----------------------------------------------------------------------------|
| LOC101736694 | 61.8507    | 1.3389  | 0.049263153 | NA             | uncharacterized LOC101736694                                               |
| LOC101736870 | 54.5539    | 1.4139  | 0.049263153 | XP_004921666.1 | regulator of telomere elongation helicase 1 homolog isoform X1             |
| LOC101738716 | 33.0626    | -5.3256 | 0.049659187 | XP_012548713.1 | putative fatty acyl-CoA reductase CG5065 isoform X2                        |
| LOC110384702 | 8.6714     | -4.6355 | 0.049659187 | XP_021208475.1 | uncharacterized protein LOC110384702                                       |
| LOC101737397 | 61.7398    | -3.3206 | 0.050294668 | XP_004926295.1 | uncharacterized protein LOC101737397                                       |
| serpin-22    | 10205.4367 | 1.0866  | 0.050294668 | NP_001139715.1 | serine protease inhibitor 22 precursor                                     |
| LOC101746063 | 232.5626   | 1.7900  | 0.053253987 | XP_004930186.1 | uncharacterized protein LOC101746063 isoform X1                            |
| raf          | 19.8223    | 3.9610  | 0.054871642 | NP_001189459.1 | raf kinase, effector of Ras                                                |
| LOC119629983 | 10.7300    | 2.3425  | 0.054886606 | NA             | U6 spliceosomal RNA                                                        |
| Fln          | 22.2550    | -5.9854 | 0.055195237 | NP_001130045.1 | flightin                                                                   |
| LOC101739471 | 55.9416    | -3.2999 | 0.055406675 | XP_004930886.2 | venom serine carboxypeptidase                                              |
| LOC110384858 | 2254.7376  | 0.6030  | 0.056290067 | XP_037868883.1 | arylsulfatase B                                                            |
| LOC119628887 | 48.4605    | 1.6661  | 0.056290067 | XP_037868835.1 | piggyBac transposable element-derived protein 4-like isoform X2            |
| LOC101739617 | 257.3515   | 1.0713  | 0.056290067 | XP_004933048.1 | exosome complex component CSL4                                             |
| LOC101743258 | 25.3831    | 6.6577  | 0.056706356 | XP_012545526.1 | Bardet-Biedl syndrome 5 protein homolog                                    |
| LOC101743076 | 391.4406   | 0.8008  | 0.056773096 | XP_012546322.2 | uncharacterized protein LOC101743076                                       |
| Lsp-t        | 195.6942   | -3.4947 | 0.057939724 | NP_001036908.1 | LSP-T protein precursor                                                    |
| LOC101741919 | 18.5975    | -4.3027 | 0.058166335 | XP_004928309.1 | putative uncharacterized protein DDB_G0285869                              |
| LOC110384792 | 80.9967    | 1.4482  | 0.05973262  | NA             | uncharacterized LOC110384792                                               |
| LOC101746321 | 88.4349    | 1.0450  | 0.060696179 | XP_004922821.1 | charged multivesicular body protein 2a                                     |
| LOC101736114 | 801.6093   | -1.0647 | 0.061263025 | XP_021208433.1 | 2-amino-3-ketobutyrate coenzyme A ligase, mitochondrial                    |
| LOC101740198 | 31.3889    | -6.1979 | 0.061916437 | XP_021206262.1 | uncharacterized protein LOC101740198                                       |
| LOC119629478 | 49.6240    | 1.6225  | 0.061916437 | XP_037871299.1 | piggyBac transposable element-derived protein 4-like isoform X2            |
| LOC101737724 | 49.1243    | -2.5681 | 0.061916437 | XP_021203566.1 | digestive cysteine proteinase 1 isoform X1                                 |
| LOC101746309 | 108.4360   | -0.7310 | 0.061916437 | XP_004931986.1 | 18S rRNA aminocarboxypropyltransferase                                     |
| LOC101743953 | 40.4260    | -4.2372 | 0.062346852 | XP_021207905.1 | uncharacterized protein LOC101743953 isoform X1                            |
| LOC101741119 | 2433.7513  | 0.9312  | 0.062445513 | XP_021206281.2 | sulfotransferase family cytosolic 1B member 1 isoform X1                   |
| LOC100141506 | 754.9367   | -4.0529 | 0.062445513 | NP_001112375.1 | heat shock protein 25.4 precursor                                          |
| LOC101745717 | 88.1543    | 0.8211  | 0.062445513 | XP_004927177.1 | reticulon-4-interacting protein 1, mitochondrial                           |
| LOC101738982 | 167.9906   | 0.8570  | 0.062445513 | XP_021204562.1 | mitochondrial import inner membrane translocase subunit TIM50-C isoform X2 |
| LOC110385248 | 44.2267    | 2.0718  | 0.062445513 | XP_037874908.1 | uncharacterized protein LOC110385248                                       |

|              |           |         |             |                |                                                                         |
|--------------|-----------|---------|-------------|----------------|-------------------------------------------------------------------------|
| serpin-7     | 41.7396   | -3.9145 | 0.062445513 | NP_001139701.1 | serine protease inhibitor 7 precursor                                   |
| LOC119631020 | 5.1132    | -4.7619 | 0.062445513 | XP_037877468.1 | uncharacterized protein LOC119631020                                    |
| LOC778507    | 30.6882   | 1.3487  | 0.062980161 | NP_001091802.1 | uncharacterized protein LOC778507                                       |
| LOC101744522 | 17.3507   | 4.6414  | 0.063386819 | XP_037867150.1 | monocarboxylate transporter 1 isoform X2                                |
| LOC119630620 | 6.1624    | 5.5786  | 0.063500166 | XP_037876474.1 | protein ALP1-like                                                       |
| LOC101739118 | 324.8750  | 0.7174  | 0.063500166 | XP_004924837.1 | dehydrogenase/reductase SDR family protein 7-like                       |
| LOC119629131 | 6.1624    | 5.5786  | 0.063500166 | XP_037869966.1 | protein ALP1-like                                                       |
| LOC101745849 | 147.2159  | -2.7202 | 0.063500166 | XP_037873941.1 | ethanolaminephosphotransferase 1                                        |
| LOC101744811 | 164.0180  | -3.7033 | 0.063614802 | XP_004930711.1 | uncharacterized protein LOC101744811                                    |
| LOC101739734 | 178.9284  | 1.3530  | 0.063769721 | XP_037870571.1 | solute carrier family 52, riboflavin transporter, member 3-B isoform X4 |
| LOC692845    | 1100.1758 | 0.6842  | 0.064324713 | NP_001040155.1 | short-chain dehydrogenase/reductase-like                                |
| LOC101740948 | 144.8721  | 0.7438  | 0.066515927 | XP_004932772.1 | 5-formyltetrahydrofolate cyclo-ligase                                   |
| LOC101739774 | 140.6589  | -3.3417 | 0.066515927 | XP_037876345.1 | phytanoyl-CoA dioxygenase, peroxisomal                                  |
| LOC101742156 | 5.3986    | -4.8872 | 0.066557292 | XP_012545706.2 | protein CBFA2T1 isoform X1                                              |
| LOC101737198 | 41.3359   | -1.5963 | 0.066683695 | XP_037875997.1 | dynactin subunit 1 isoform X8                                           |
| LOC101736450 | 115.3880  | -2.2105 | 0.067588306 | XP_037872184.1 | apyrase isoform X2                                                      |
| CPR104       | 11.0576   | -4.8447 | 0.067963803 | NP_001036854.1 | cuticular protein RR-2 motif 104 precursor                              |
| LOC692685    | 447.0109  | -4.3392 | 0.070097587 | NP_001037199.1 | promoting protein precursor                                             |
| LOC101738081 | 320.7893  | 0.6492  | 0.070158443 | XP_004925822.1 | mitochondrial fission 1 protein                                         |
| Hsp70        | 29.0997   | -5.5801 | 0.070158443 | XP_037876891.1 | heat shock protein 70                                                   |
| LOC101745323 | 23.1913   | 5.0669  | 0.071048158 | XP_004924743.1 | proton-coupled folate transporter                                       |
| LOC101743243 | 5.4293    | 3.2713  | 0.071048158 | XP_004933071.1 | phosphoacetylglucosamine mutase                                         |
| LOC101740175 | 49.6814   | 1.2997  | 0.071107541 | XP_021209097.1 | leucine-rich repeat protein SHOC-2 isoform X3                           |
| LOC119629215 | 14.5767   | -2.4969 | 0.071133038 | NA             | uncharacterized LOC119629215                                            |
| LOC110386627 | 38.0830   | -3.8295 | 0.071158248 | NA             | uncharacterized LOC110386627                                            |
| LOC119629859 | 48.9398   | 1.6164  | 0.071167901 | XP_037873204.1 | piggyBac transposable element-derived protein 4-like isoform X2         |
| LOC101742899 | 951.7628  | 0.5995  | 0.071212552 | XP_004930162.1 | probable very-long-chain enoyl-CoA reductase art-1                      |
| LOC101745023 | 1615.2361 | -1.3013 | 0.071212552 | XP_004922749.1 | protein D2                                                              |
| LOC101743388 | 24.0588   | -3.1354 | 0.071357311 | XP_004923566.2 | transmembrane protein 135 isoform X1                                    |
| LOC101739163 | 141.6761  | -0.8434 | 0.071357311 | XP_037872058.1 | filamin-A isoform X1                                                    |
| LOC100101183 | 67.6629   | -3.2249 | 0.071357311 | NP_001093281.1 | vesicle amine transport protein                                         |



|              |          |         |             |                |                                                                 |
|--------------|----------|---------|-------------|----------------|-----------------------------------------------------------------|
| LOC101743420 | 556.1305 | 1.2307  | 0.071586642 | XP_004931814.3 | uncharacterized protein LOC101743420                            |
| LOC101736202 | 121.6214 | 0.7369  | 0.071667959 | XP_004931273.1 | 3-oxoacyl-[acyl-carrier-protein] reductase FabG                 |
| LOC101739835 | 90.7839  | 0.9455  | 0.071667959 | XP_004929469.1 | sodium/hydrogen exchanger 9B2 isoform X7                        |
| LOC101735745 | 36.2416  | 1.2614  | 0.07175369  | XP_004926778.1 | F-box/LRR-repeat protein 20                                     |
| LOC101740799 | 75.3352  | -2.8651 | 0.071802323 | XP_004930684.1 | uncharacterized protein LOC101740799                            |
| LOC101745532 | 50.9017  | 1.8416  | 0.071960064 | XP_004929426.1 | probable ATP-dependent RNA helicase DDX28                       |
| LOC101746172 | 11.8843  | 3.6537  | 0.072093322 | XP_004934209.2 | uncharacterized protein LOC101746172                            |
| LOC101741494 | 36.5278  | -1.4075 | 0.072352938 | XP_012548024.1 | uncharacterized protein LOC101741494                            |
| LOC101740372 | 443.9038 | -1.4282 | 0.072352938 | XP_012547588.1 | visual system homeobox 2 isoform X1                             |
| ST2          | 162.0925 | -1.5030 | 0.072352938 | NP_001182632.1 | sugar transporter protein 2                                     |
| LOC101738343 | 100.0711 | -2.2283 | 0.072973773 | XP_004926302.1 | lysozyme                                                        |
| LOC101746587 | 40.8760  | -4.4829 | 0.072973773 | XP_004931158.1 | tetratricopeptide repeat protein 1                              |
| LOC101743242 | 436.5083 | -2.7983 | 0.074178244 | XP_037875112.1 | putative uncharacterized protein DDB_G0282133                   |
| LOC101738115 | 29.2818  | -1.3044 | 0.074419759 | XP_004923663.1 | 6-phosphofructo-2-kinase/fructose-2,6-bisphosphatase isoform X4 |
| LOC101736302 | 49.9014  | -3.6508 | 0.074448534 | XP_004922006.1 | uncharacterized protein LOC101736302                            |
| LOC101745175 | 65.7524  | -3.2503 | 0.074984383 | XP_037876240.1 | lopap                                                           |
| LOC101742613 | 462.7264 | -3.2474 | 0.0767972   | XP_004933832.1 | uncharacterized protein LOC101742613                            |
| LOC101736858 | 147.1422 | 0.9471  | 0.077061798 | XP_004932127.1 | tRNA N(3)-methylcytidine methyltransferase METTL2 isoform X2    |
| LOC101743405 | 63.3738  | 1.4237  | 0.077818155 | XP_012547668.1 | methyltransferase-like protein 25                               |
| LOC105842323 | 24.8943  | -6.2212 | 0.078152199 | XP_012550110.1 | uncharacterized protein LOC105842323                            |
| LOC733001    | 57.3376  | -3.2926 | 0.080535772 | XP_037875581.1 | serine proteinase-like protein isoform X1                       |
| LOC101736585 | 82.7758  | 0.9903  | 0.081277047 | XP_004931276.1 | short coiled-coil protein homolog                               |
| LOC105842145 | 43.4136  | 1.6323  | 0.081277047 | NA             | uncharacterized LOC105842145                                    |
| LOC101735849 | 33.7318  | 1.6570  | 0.082131708 | XP_012551913.1 | 4-coumarate--CoA ligase 1                                       |
| NGR-B1       | 19.3961  | -2.0683 | 0.08244969  | XP_037868157.1 | neuropeptide receptor B1 isoform X1                             |
| Cjhbp        | 96.0747  | 1.2326  | 0.082776009 | NP_001037668.1 | cytosolic juvenile hormone binding protein 36 kDa subunit       |
| LOC101739069 | 264.3352 | -2.9449 | 0.082776009 | XP_021202615.2 | inter-alpha-trypsin inhibitor heavy chain H4 isoform X1         |
| LOC101743011 | 11.8302  | -5.6420 | 0.082776009 | XP_037872991.1 | protein C1orf194 homolog isoform X2                             |
| LOC101746665 | 95.1712  | -1.5307 | 0.082776009 | XP_004928342.1 | mitochondrial genome maintenance exonuclease 1 isoform X1       |
| LOC119630461 | 12.3734  | 2.7814  | 0.082776009 | XP_037875894.1 | uncharacterized protein LOC119630461                            |
| LOC101735769 | 31.2552  | 3.9453  | 0.082776009 | XP_021208533.1 | uncharacterized protein LOC101735769 isoform X2                 |
| LOC101744832 | 9.5699   | -6.2953 | 0.083378581 | XP_004924666.1 | uncharacterized protein LOC101744832 isoform X4                 |



|              |          |         |             |                |                                                                   |
|--------------|----------|---------|-------------|----------------|-------------------------------------------------------------------|
| LOC101745657 | 68.5100  | 1.1045  | 0.083912695 | XP_012543915.1 | GPI mannosyltransferase 4                                         |
| LOC101738839 | 17.1237  | 2.0951  | 0.085210763 | XP_037871706.1 | uncharacterized protein LOC101738839 isoform X1                   |
| LOC101739844 | 138.9796 | -1.5134 | 0.085210763 | XP_021207594.1 | uncharacterized protein LOC101739844 isoform X2                   |
| LOC101736188 | 27.3774  | -1.5633 | 0.085210763 | XP_021205311.1 | uncharacterized protein LOC101736188 isoform X1                   |
| LOC101739927 | 59.6730  | 0.9578  | 0.085210763 | XP_021205518.1 | calcium release-activated calcium channel protein 1 isoform X6    |
| LOC110386390 | 64.2998  | 1.5187  | 0.08577822  | NA             | uncharacterized LOC110386390                                      |
| LOC101738197 | 69.6863  | 1.1037  | 0.086230681 | XP_004923056.1 | X-linked retinitis pigmentosa GTPase regulator homolog isoform X1 |
| LOC101745519 | 293.0657 | -2.8152 | 0.086230681 | XP_037872940.1 | ommochrome-binding protein                                        |
| LOC101741551 | 5.3601   | -6.8174 | 0.08679326  | XP_021208557.1 | axoneme-associated protein mst101(2) isoform X2                   |
| LOC101737693 | 45.2579  | -2.9303 | 0.087007922 | XP_012548790.3 | uncharacterized protein LOC101737693                              |
| LOC119630502 | 59.1089  | 1.6507  | 0.087222908 | NA             | uncharacterized LOC119630502                                      |
| LOC733032    | 29.6923  | 1.3590  | 0.087273643 | NP_001040489.1 | DNA-3-methyladenine glycosylase I                                 |
| LOC101745338 | 15.1679  | -2.7498 | 0.087273643 | XP_037875057.1 | uncharacterized protein LOC101745338                              |
| LOC692805    | 225.5405 | 0.9370  | 0.087476451 | NP_001040117.1 | dynactin 4 protein                                                |
| LOC101739109 | 48.2065  | 1.2760  | 0.088213949 | XP_012548967.1 | zinc finger protein 239-like                                      |
| LOC101739651 | 59.7942  | 1.0446  | 0.089602135 | XP_004930565.1 | ras-related C3 botulinum toxin substrate 1                        |
| LOC101745551 | 18.9712  | -5.1723 | 0.089998768 | XP_037869336.1 | NADPH oxidase 4 isoform X2                                        |
| yellow-f     | 27.7045  | -2.3569 | 0.090528766 | XP_037868167.1 | uncharacterized protein LOC101736658 isoform X1                   |
| LOC119630595 | 16.9372  | -2.0769 | 0.090528766 | XP_037876423.1 | uncharacterized protein LOC119630595                              |
| LOC101742487 | 97.6843  | 1.1289  | 0.092696771 | XP_021202497.2 | G patch domain and ankyrin repeat-containing protein 1 homolog    |
| LOC101743906 | 14.1428  | 2.0742  | 0.092921478 | XP_037877760.1 | uncharacterized protein LOC101743906                              |
| LOC101735747 | 41.8247  | 1.8792  | 0.093649561 | XP_004927249.1 | general transcription factor IIH subunit 3                        |
| LOC101745059 | 142.2931 | -1.0092 | 0.094685088 | XP_012544843.2 | helicase SKI2W                                                    |
| LOC101736001 | 70.5506  | 1.0232  | 0.096350348 | XP_037876759.1 | vinculin                                                          |
| LOC101737161 | 171.7895 | -0.9776 | 0.097239509 | XP_037877751.1 | cytoplasmic dynein 1 light intermediate chain 2                   |
| LOC110385005 | 36.7096  | -1.1700 | 0.098164974 | XP_037873331.1 | uncharacterized protein LOC110385005 isoform X1                   |
| LOC101745477 | 375.8597 | -0.9116 | 0.098164974 | XP_012546787.2 | protein mini spindles                                             |
| LOC101737707 | 24.8642  | 1.8694  | 0.098164974 | XP_004921931.1 | chondroadherin                                                    |
| LOC101739178 | 28.7917  | -1.5027 | 0.098164974 | XP_037873042.1 | leucine-rich repeat-containing protein 58 isoform X2              |
| LOC732926    | 25.9132  | -3.7294 | 0.098164974 | NP_001040391.1 | tetraspanin E118                                                  |
| LOC101743886 | 7.9724   | -5.9175 | 0.098164974 | XP_037873604.1 | solute carrier family 22 member 5 isoform X2                      |

|              |           |         |             |                |                                                 |
|--------------|-----------|---------|-------------|----------------|-------------------------------------------------|
| LOC101740334 | 20.3930   | -2.8520 | 0.098164974 | XP_004930768.1 | glucose-1-phosphatase                           |
| LOC732993    | 264.1469  | 0.7940  | 0.098164974 | NP_001040454.1 | ML-domain containing secreted protein precursor |
| LOC101735402 | 9.2815    | -2.3197 | 0.098164974 | XP_037877359.1 | uncharacterized protein LOC101735402            |
| LOC119630925 | 7.2879    | -2.7615 | 0.098164974 | XP_037877382.1 | uncharacterized protein LOC119630925 isoform X1 |
| LOC101735996 | 39.3110   | -2.4281 | 0.098196633 | XP_004924762.1 | protein Spindly                                 |
| Gata-beta    | 13.0925   | -3.9695 | 0.098348774 | XP_037871548.1 | transcription factor BCFI isoform X3            |
| LOC119629332 | 9.5577    | 2.4831  | 0.098615399 | NA             | U6 spliceosomal RNA                             |
| Nopp34       | 1086.4584 | 0.9385  | 0.098790808 | NP_001037642.1 | nucleolar phosphoprotein                        |
| LOC101743166 | 45.8563   | -1.1822 | 0.099021105 | XP_004924867.1 | probable serine hydrolase                       |
| LOC101745112 | 12.1924   | -2.5658 | 0.099021105 | XP_037876635.1 | telomere length regulation protein TEL2 homolog |

**Table S2.** GO terms enriched among upregulated genes in the silk glands of selected *Bombyx mori* strains from CAR.

| GO Term ID                | GO description                                   | p-value |
|---------------------------|--------------------------------------------------|---------|
| <i>Biological Process</i> |                                                  |         |
| GO:0006221                | pyrimidine nucleotide biosynthetic process       | 0.013   |
| GO:0006139                | nucleobase-containing compound metabolic process | 0.013   |
| GO:0000266                | mitochondrial fission                            | 0.014   |
| GO:0019509                | L-methionine salvage from methylthioadenosine    | 0.014   |
| GO:0006396                | RNA processing                                   | 0.014   |
| GO:0051726                | regulation of cell cycle                         | 0.016   |
| GO:0006974                | cellular response to DNA damage stimulus         | 0.016   |
| GO:0006629                | lipid metabolic process                          | 0.016   |
| GO:0016560                | protein import into peroxisome matrix, docking   | 0.016   |
| GO:0006355                | regulation of transcription, DNA-templated       | 0.016   |
| GO:0009058                | biosynthetic process                             | 0.017   |
| GO:0005975                | carbohydrate metabolic process                   | 0.017   |
| GO:0071704                | organic substance metabolic process              | 0.017   |
| GO:0016180                | snRNA processing                                 | 0.017   |
| GO:0007015                | actin filament organization                      | 0.017   |
| GO:0033014                | tetrapyrrole biosynthetic process                | 0.017   |
| GO:0043039                | tRNA aminoacylation                              | 0.017   |
| GO:0032367                | intracellular cholesterol transport              | 0.028   |
| GO:0055114                | (obsolete) oxidation-reduction process           | 0.032   |
| <i>Cellular Component</i> |                                                  |         |
| GO:0000178                | exosome (RNase complex)                          | 0.014   |
| GO:0005737                | cytoplasm                                        | 0.014   |
| GO:0005778                | peroxisomal membrane                             | 0.016   |
| GO:0031209                | SCAR complex                                     | 0.017   |
| GO:0000439                | transcription factor TFIIH core complex          | 0.017   |
| GO:0034464                | BBSome                                           | 0.032   |
| <i>Molecular Function</i> |                                                  |         |
| GO:0019205                | nucleobase-containing compound kinase activity   | 0.013   |

|            |                                                                            |       |
|------------|----------------------------------------------------------------------------|-------|
| GO:0009041 | uridylate kinase activity                                                  | 0.013 |
| GO:0005515 | protein binding                                                            | 0.014 |
| GO:0003723 | RNA binding                                                                | 0.014 |
| GO:0046872 | metal ion binding                                                          | 0.014 |
| GO:0016627 | oxidoreductase activity, acting on the CH-CH group of donors               | 0.016 |
| GO:0008531 | riboflavin kinase activity                                                 | 0.016 |
| GO:0003824 | catalytic activity                                                         | 0.017 |
| GO:0016868 | intramolecular transferase activity, phosphotransferases                   | 0.017 |
| GO:0004812 | aminoacyl-tRNA ligase activity                                             | 0.017 |
| GO:0044877 | protein-containing complex binding                                         | 0.017 |
| GO:0030170 | pyridoxal phosphate binding                                                | 0.017 |
| GO:0080048 | GDP-D-glucose phosphorylase activity                                       | 0.017 |
| GO:0003870 | 5-aminolevulinate synthase activity                                        | 0.017 |
| GO:0003676 | nucleic acid binding                                                       | 0.017 |
| GO:0000166 | nucleotide binding                                                         | 0.017 |
| GO:0004610 | phosphoacetylglucosamine mutase activity                                   | 0.017 |
| GO:0016747 | acyltransferase activity, transferring groups other than amino-acyl groups | 0.032 |
| GO:0016491 | oxidoreductase activity                                                    | 0.033 |
| GO:0008270 | zinc ion binding                                                           | 0.033 |
| GO:0016757 | glycosyltransferase activity                                               | 0.033 |
| GO:0008641 | ubiquitin-like modifier activating enzyme activity                         | 0.033 |
| GO:0033961 | cis-stilbene-oxide hydrolase activity                                      | 0.049 |

---

**Table S3.** GO terms enriched among downregulated genes in the silk glands of selected *Bombyx mori* strains from CAR.

| GO Term ID                | GO description                                       | p-value |
|---------------------------|------------------------------------------------------|---------|
| <i>Biological Process</i> |                                                      |         |
| GO:0005975                | carbohydrate metabolic process                       | 0.005   |
| GO:0006351                | transcription, DNA-templated                         | 0.017   |
| GO:0006526                | arginine biosynthetic process                        | 0.017   |
| GO:0015031                | protein transport                                    | 0.018   |
| GO:0016052                | carbohydrate catabolic process                       | 0.018   |
| GO:0006281                | DNA repair                                           | 0.017   |
| GO:0006003                | fructose 2,6-bisphosphate metabolic process          | 0.020   |
| GO:0009058                | biosynthetic process                                 | 0.020   |
| GO:0006000                | fructose metabolic process                           | 0.020   |
| GO:0035434                | copper ion transmembrane transport                   | 0.021   |
| GO:0032367                | intracellular cholesterol transport                  | 0.030   |
| GO:0016192                | vesicle-mediated transport                           | 0.038   |
| GO:0007186                | G protein-coupled receptor signaling pathway         | 0.038   |
| GO:0007166                | cell surface receptor signaling pathway              | 0.038   |
| GO:0055114                | (obsolete) oxidation-reduction process               | 0.040   |
| <i>Cellular Component</i> |                                                      |         |
| GO:0005615                | extracellular space                                  | 0.007   |
| GO:0000439                | transcription factor TFIID core complex              | 0.017   |
| GO:0016020                | membrane                                             | 0.018   |
| GO:0016021                | integral component of membrane                       | 0.021   |
| GO:0030131                | clathrin adaptor complex                             | 0.038   |
| <i>Molecular Function</i> |                                                      |         |
| GO:0004553                | hydrolase activity, hydrolyzing O-glycosyl compounds | 0.005   |
| GO:0008270                | zinc ion binding                                     | 0.017   |
| GO:0004833                | tryptophan 2,3-dioxygenase activity                  | 0.017   |
| GO:0004055                | argininosuccinate synthase activity                  | 0.017   |
| GO:0020037                | heme binding                                         | 0.017   |
| GO:0005524                | ATP binding                                          | 0.017   |

|            |                                                                                         |       |
|------------|-----------------------------------------------------------------------------------------|-------|
| GO:0046872 | metal ion binding                                                                       | 0.017 |
| GO:0050023 | L-fuconate dehydratase activity                                                         | 0.018 |
| GO:0016787 | hydrolase activity                                                                      | 0.018 |
| GO:0016812 | hydrolase activity, acting on carbon-nitrogen (but not peptide) bonds, in cyclic amides | 0.018 |
| GO:0016810 | hydrolase activity, acting on carbon-nitrogen (but not peptide) bonds                   | 0.018 |
| GO:0003824 | catalytic activity                                                                      | 0.019 |
| GO:0003677 | DNA binding                                                                             | 0.019 |
| GO:0016788 | hydrolase activity, acting on ester bonds                                               | 0.019 |
| GO:0004518 | nuclease activity                                                                       | 0.019 |
| GO:0008890 | glycine C-acetyltransferase activity                                                    | 0.020 |
| GO:0016740 | transferase activity                                                                    | 0.020 |
| GO:0003873 | 6-phosphofructo-2-kinase activity                                                       | 0.020 |
| GO:0030170 | pyridoxal phosphate binding                                                             | 0.020 |
| GO:0019205 | nucleobase-containing compound kinase activity                                          | 0.020 |
| GO:0005375 | copper ion transmembrane transporter activity                                           | 0.021 |
| GO:0003796 | lysozyme activity                                                                       | 0.027 |
| GO:0004888 | transmembrane signaling receptor activity                                               | 0.038 |
| GO:0016491 | oxidoreductase activity                                                                 | 0.040 |

---
